# Supplementary material for: Mitochondrial DNA diversity of D-loop region in three native Turkish cattle breeds
Source: Arch Anim Breed. 2023 Jan 24;66(1):31–40. doi: 10.5194/aab-66-31-2023 (PMC9901521; doi:10.5194/aab-66-31-2023)
Supplement: The supplement related to this article is available online at: https://doi.org/10.5194/aab-66-31-2023-supplement. [file aab-66-31-supplement.zip]

Archive with 4 entries (4 files):
- File S3.pdf
- File S1.pdf
- File S2.pdf
- aab-66-31-2023-supplement-title-page.pdf
