# Supplementary material for: Mitochondrial DNA diversity of D-loop region in three native Turkish cattle breeds
Source: Arch Anim Breed. 2023 Jan 24;66(1):31–40. doi: 10.5194/aab-66-31-2023 (PMC9901521; doi:10.5194/aab-66-31-2023)
Supplement: The supplement related to this article is available online at: https://doi.org/10.5194/aab-66-31-2023-supplement. [file aab-66-31-supplement.zip › File S1.pdf]

**Supplementary file 1.** Haplotype and haplogroup distribution based on breeds and geographic locations

| Haplotypes   | Haplogroup | Breeds    |            |            | Sampling Locations |           |           |          |
|--------------|------------|-----------|------------|------------|--------------------|-----------|-----------|----------|
|              |            | AB<br>(n) | EAR<br>(n) | ZAV<br>(n) | Kütahya            | Antalya   | Erzurum   | Kars     |
| Hap_1        | T3h        | 1         | 0          | 0          | +                  | -         | -         | -        |
| Hap_2        | T1b        | 4         | 0          | 0          | +                  | +         | -         | -        |
| Hap_3        | T2         | 2         | 0          | 0          | +                  | +         | -         | -        |
| Hap_4        | T3         | 4         | 0          | 0          | +                  | +         | -         | -        |
| Hap_5        | T3         | 1         | 0          | 0          | -                  | +         | -         | -        |
| Hap_6        | T2         | 2         | 0          | 0          | -                  | +         | -         | -        |
| Hap_7        | T2         | 1         | 0          | 0          | -                  | +         | -         | -        |
| Hap_8        | T2         | 1         | 0          | 0          | -                  | +         | -         | -        |
| Hap_9        | T3o        | 1         | 0          | 0          | -                  | +         | -         | -        |
| Hap_10       | T1c        | 1         | 0          | 0          | -                  | +         | -         | -        |
| Hap_11       | Q          | 1         | 0          | 0          | -                  | +         | -         | -        |
| Hap_12       | T3         | 1         | 0          | 0          | -                  | +         | -         | -        |
| Hap_13       | T3         | 1         | 0          | 0          | -                  | +         | -         | -        |
| Hap_14       | T2b        | 1         | 0          | 0          | -                  | +         | -         | -        |
| Hap_15       | T          | 1         | 0          | 0          | -                  | +         | -         | -        |
| Hap_16       | T1b1       | 0         | 2          | 0          | -                  | -         | +         | -        |
| Hap_17       | T1         | 0         | 2          | 0          | -                  | -         | +         | -        |
| Hap_18       | T3         | 0         | 5          | 0          | -                  | -         | +         | -        |
| Hap_19       | T3d        | 0         | 1          | 0          | -                  | -         | +         | -        |
| Hap_20       | T3         | 0         | 3          | 0          | -                  | -         | +         | -        |
| Hap_21       | Q          | 0         | 1          | 0          | -                  | -         | +         | -        |
| Hap_22       | T3         | 0         | 1          | 0          | -                  | -         | +         | -        |
| Hap_23       | T3         | 0         | 1          | 0          | -                  | -         | +         | -        |
| Hap_24       | T2         | 0         | 6          | 0          | -                  | -         | +         | -        |
| Hap_25       | T3p        | 0         | 1          | 0          | -                  | -         | +         | -        |
| Hap_26       | <b>I2</b>  | 0         | 0          | 4          | -                  | -         | -         | +        |
| Hap_27       | T3q        | 0         | 0          | 2          | -                  | -         | -         | +        |
| Hap_28       | Q          | 0         | 0          | 2          | -                  | -         | -         | +        |
| Hap_29       | T1b1       | 0         | 0          | 2          | -                  | -         | -         | +        |
| Hap_30       | T3         | 0         | 0          | 4          | -                  | -         | -         | +        |
| Hap_31       | T1b1       | 0         | 0          | 1          | -                  | -         | -         | +        |
| <b>Total</b> | <b>-</b>   | <b>15</b> | <b>10</b>  | <b>6</b>   | <b>4</b>           | <b>14</b> | <b>10</b> | <b>6</b> |
