# Supplementary material for: Mitochondrial DNA diversity of D-loop region in three native Turkish cattle breeds
Source: Arch Anim Breed. 2023 Jan 24;66(1):31–40. doi: 10.5194/aab-66-31-2023 (PMC9901521; doi:10.5194/aab-66-31-2023)
Supplement: The supplement related to this article is available online at: https://doi.org/10.5194/aab-66-31-2023-supplement. [file aab-66-31-supplement.zip › File S2.pdf]

**Supplementary file 2.** An overview of the sequences retrieved from GenBank database

| <b>Breed</b>      | <b>Accession Numbers</b> | <b>End Position (~bp)</b> | <b>Start Position (~bp)</b> | <b>Length (bp)</b> | <b>References</b>   |
|-------------------|--------------------------|---------------------------|-----------------------------|--------------------|---------------------|
| Brown Swiss       | AF016072                 | 457                       | 15695                       | 798                | Hansen et al., 2003 |
| Brown Swiss       | AF016073                 | 457                       | 15695                       | 799                | Hansen et al., 2003 |
| Brown Swiss       | AF016074                 | 457                       | 15695                       | 800                | Hansen et al., 2003 |
| Brown Swiss       | AF016075                 | 457                       | 15695                       | 798                | Hansen et al., 2003 |
| Brown Swiss       | AF016076                 | 457                       | 15695                       | 799                | Hansen et al., 2003 |
| Brown Swiss       | AF016077                 | 457                       | 15695                       | 800                | Hansen et al., 2003 |
| Brown Swiss       | AF016078                 | 457                       | 15695                       | 797                | Hansen et al., 2003 |
| Holstein Friesian | AF016079                 | 457                       | 15695                       | 798                | Hansen et al., 2003 |
| Holstein Friesian | AF016080                 | 457                       | 15695                       | 801                | Hansen et al., 2003 |
| Holstein Friesian | AF016081                 | 457                       | 15695                       | 798                | Hansen et al., 2003 |
| Holstein Friesian | AF016082                 | 457                       | 15695                       | 799                | Hansen et al., 2003 |
| Holstein Friesian | AF016083                 | 457                       | 15695                       | 798                | Hansen et al., 2003 |
| Holstein Friesian | AF016084                 | 457                       | 15695                       | 799                | Hansen et al., 2003 |
| Holstein Friesian | AF016085                 | 457                       | 15695                       | 799                | Hansen et al., 2003 |
| Holstein Friesian | AF016086                 | 457                       | 15695                       | 798                | Hansen et al., 2003 |
| Holstein Friesian | AF016087                 | 457                       | 15695                       | 799                | Hansen et al., 2003 |
| Jersey            | AF016088                 | 457                       | 15695                       | 799                | Hansen et al., 2003 |
| Jersey            | AF016089                 | 457                       | 15695                       | 796                | Hansen et al., 2003 |
| Jersey            | AF016090                 | 457                       | 15695                       | 799                | Hansen et al., 2003 |
| Jersey            | AF016091                 | 457                       | 15695                       | 800                | Hansen et al., 2003 |
| Jersey            | AF016092                 | 457                       | 15695                       | 802                | Hansen et al., 2003 |
| Jersey            | AF016093                 | 457                       | 15695                       | 800                | Hansen et al., 2003 |
| Jersey            | AF016094                 | 457                       | 15695                       | 800                | Hansen et al., 2003 |
| Jersey            | AF016095                 | 457                       | 15695                       | 800                | Hansen et al., 2003 |
| Jersey            | AF016096                 | 457                       | 15695                       | 799                | Hansen et al., 2003 |

|                   |          |     |       |     |                             |
|-------------------|----------|-----|-------|-----|-----------------------------|
| Jersey            | AF016097 | 457 | 15695 | 800 | Hansen et al., 2003         |
| Aberdeen Angus    | FJ815941 | 516 | 15737 | 910 | Ginja et al., 2010          |
| Holstein Friesian | FN562641 | 355 | 15921 | 733 | Seroussi and Yakobson, 2010 |
| Holstein Friesian | FN556952 | 355 | 15921 | 733 | Seroussi and Yakobson, 2010 |
| Simmental         | FN562585 |     |       |     |                             |
| Holstein Friesian | FJ815867 | 516 | 15737 | 910 | Ginja et al., 2010          |
| Simmental         | FN562620 | 355 | 15921 | 733 | Seroussi and Yakobson, 2010 |
| Holstein Friesian | FN557398 | 355 | 15921 | 733 | Seroussi and Yakobson, 2010 |
| Simmental         | FN562612 |     |       | 732 |                             |
| Holstein Friesian | FN562661 | 355 | 15921 | 732 | Seroussi and Yakobson, 2010 |
| Holstein Friesian | AF361448 | 355 | 15921 | 918 | Steinborn et al., 2002      |
| Jersey            | AF389179 |     |       | 948 | Slate and Phua, 2003        |
| Aberdeen Angus    | FN562609 | 355 | 15921 | 733 | Seroussi and Yakobson, 2010 |
| Holstein Friesian | FN556942 |     |       | 732 |                             |
| Aberdeen Angus    | FJ815946 | 516 | 15737 | 909 | Ginja et al., 2010          |
| Holstein Friesian | FN562651 | 355 | 15921 | 733 | Seroussi and Yakobson, 2010 |
| Holstein Friesian | FN556936 | 355 | 15921 | 733 | Seroussi and Yakobson, 2010 |
| Holstein Friesian | FN556981 | 355 | 15921 | 733 | Seroussi and Yakobson, 2010 |
| Simmental         | FN562584 | 355 | 15921 | 733 | Seroussi and Yakobson, 2010 |
| Aberdeen Angus    | FN562600 | 355 | 15921 | 733 | Seroussi and Yakobson, 2010 |
| Jersey            | AF389178 |     |       |     |                             |
| Holstein Friesian | FN557371 | 355 | 15921 | 733 | Seroussi and Yakobson, 2010 |
| Jersey            | FJ815991 | 516 | 15737 | 909 | Ginja et al., 2010          |
| Holstein Friesian | FN562649 | 355 | 15921 | 733 | Seroussi and Yakobson, 2010 |
| Simmental         | FN562616 |     |       |     |                             |
| Holstein Friesian | FN562644 | 355 | 15921 | 733 | Seroussi and Yakobson, 2010 |
| Holstein Friesian | AF361447 | 355 | 15921 | 918 | Steinborn et al., 2002      |
| Holstein Friesian | FN556951 | 355 | 15921 | 733 | Seroussi and Yakobson, 2010 |
| Holstein Friesian | FN556958 | 355 | 15921 | 733 | Seroussi and Yakobson, 2010 |

|                   |          |     |       |     |                                                            |
|-------------------|----------|-----|-------|-----|------------------------------------------------------------|
| Holstein Friesian | FN556969 | 355 | 15921 | 733 | Seroussi and Yakobson, 2010                                |
| Aberdeen Angus    | FN562602 | 355 | 15921 | 733 | Seroussi and Yakobson, 2010                                |
| Holstein Friesian | FN562662 | 355 | 15921 | 732 | Seroussi and Yakobson, 2010                                |
| Holstein Friesian | FN556966 | 355 | 15921 | 735 | Seroussi and Yakobson, 2010                                |
| Aberdeen Angus    | FN562589 | 355 | 15921 | 733 | Seroussi and Yakobson, 2010                                |
| Jersey            | AF389176 | 363 | 15792 | 979 | Slate and Phua, 2003                                       |
| Holstein Friesian | FN556980 | 355 | 15921 | 733 | Seroussi and Yakobson, 2010                                |
| Jersey            | FJ815996 | 516 | 15737 | 909 | Ginja et al., 2010                                         |
| Holstein Friesian | FN557380 | 355 | 15921 | 733 | Seroussi and Yakobson, 2010                                |
| Holstein Friesian | FN556975 | 355 | 15921 | 733 | Seroussi and Yakobson, 2010                                |
| Aberdeen Angus    | FN562592 | 355 | 15921 | 733 | Seroussi and Yakobson, 2010                                |
| Jersey            | AF389184 | 363 | 15792 | 969 | Slate and Phua, 2003                                       |
| Simmental         | AF492427 | 355 | 15921 | 910 | Hiendleder et al., 2008                                    |
| Holstein Friesian | FN556940 | 355 | 15921 | 733 | Seroussi and Yakobson, 2010                                |
| Holstein Friesian | FN557387 | 355 | 15921 | 733 | Seroussi and Yakobson, 2010                                |
| Holstein Friesian | FN557375 | 355 | 15921 | 732 | Seroussi and Yakobson, 2010                                |
| Jersey            | FJ816000 | 516 | 15737 | 908 | Ginja et al., 2010                                         |
| Aberdeen Angus    | FN562604 | 355 | 15921 | 732 | Seroussi and Yakobson, 2010                                |
| Holstein Friesian | AY998841 | 363 | 15792 | 911 | Direct submission (Shanghai Institute of Medical Genetics) |
| Holstein Friesian | FN556974 | 355 | 15921 | 732 | Seroussi and Yakobson, 2010                                |
| Holstein Friesian | FN556968 | 355 | 15921 | 733 | Seroussi and Yakobson, 2010                                |
| Holstein Friesian | FN556959 | 355 | 15921 | 735 | Seroussi and Yakobson, 2010                                |
| Simmental         | FN562611 | 355 | 15921 | 734 | Seroussi and Yakobson, 2010                                |
| Holstein Friesian | FN562646 | 355 | 15921 | 733 | Seroussi and Yakobson, 2010                                |
| Hereford          | FN557438 | 355 | 15921 | 733 | Seroussi and Yakobson, 2010                                |
| Holstein Friesian | FN557404 |     |       |     |                                                            |
| Simmental         | FN562586 | 355 | 15921 | 733 | Seroussi and Yakobson, 2010                                |
| Simmental         | FN562618 | 355 | 15921 | 733 | Seroussi and Yakobson, 2010                                |

|                   |          |     |       |     |                             |
|-------------------|----------|-----|-------|-----|-----------------------------|
| Holstein Friesian | FN557405 | 355 | 15921 | 732 | Seroussi and Yakobson, 2010 |
| Holstein Friesian | FN557393 | 355 | 15921 | 732 | Seroussi and Yakobson, 2010 |
| Holstein Friesian | FN556956 | 355 | 15921 | 732 | Seroussi and Yakobson, 2010 |
| Holstein Friesian | FN556937 | 355 | 15921 | 732 | Seroussi and Yakobson, 2010 |
| Holstein Friesian | FN556961 | 355 | 15921 | 732 | Seroussi and Yakobson, 2010 |
| Holstein Friesian | FN562634 | 355 | 15921 | 732 | Seroussi and Yakobson, 2010 |
| Hereford          | FN557433 | 355 | 15921 | 732 | Seroussi and Yakobson, 2010 |
| Holstein Friesian | FN562663 | 355 | 15921 | 735 | Seroussi and Yakobson, 2010 |
| Holstein Friesian | FN557397 | 355 | 15921 | 734 | Seroussi and Yakobson, 2010 |
| Hereford          | FN557440 | 355 | 15921 | 734 | Seroussi and Yakobson, 2010 |
| Holstein Friesian | FN557406 | 355 | 15921 | 733 | Seroussi and Yakobson, 2010 |
| Holstein Friesian | FN562638 | 355 | 15921 | 733 | Seroussi and Yakobson, 2010 |
| Holstein Friesian | FN556953 | 355 | 15921 | 733 | Seroussi and Yakobson, 2010 |
| Holstein Friesian | FN556954 | 355 | 15921 | 733 | Seroussi and Yakobson, 2010 |
| Holstein Friesian | FN562650 | 355 | 15921 | 733 | Seroussi and Yakobson, 2010 |
| Holstein Friesian | FN562639 | 355 | 15921 | 733 | Seroussi and Yakobson, 2010 |
| Holstein Friesian | FN562640 | 355 | 15921 | 733 | Seroussi and Yakobson, 2010 |
| Holstein Friesian | FN557408 | 355 | 15921 | 733 | Seroussi and Yakobson, 2010 |
| Holstein Friesian | FN562642 | 355 | 15921 | 733 | Seroussi and Yakobson, 2010 |
| Holstein Friesian | FN557413 | 355 | 15921 | 733 | Seroussi and Yakobson, 2010 |
| Simmental         | FN562583 | 355 | 15921 | 733 | Seroussi and Yakobson, 2010 |
| Holstein Friesian | FN562627 | 355 | 15921 | 733 | Seroussi and Yakobson, 2010 |
| Holstein Friesian | FN562628 | 355 | 15921 | 733 | Seroussi and Yakobson, 2010 |
| Holstein Friesian | FN562629 | 355 | 15921 | 733 | Seroussi and Yakobson, 2010 |
| Holstein Friesian | FN562630 | 355 | 15921 | 733 | Seroussi and Yakobson, 2010 |
| Holstein Friesian | FN562633 | 355 | 15921 | 733 | Seroussi and Yakobson, 2010 |
| Holstein Friesian | FN556962 | 355 | 15921 | 733 | Seroussi and Yakobson, 2010 |
| Holstein Friesian | FN562652 | 355 | 15921 | 733 | Seroussi and Yakobson, 2010 |
| Holstein Friesian | FN557403 | 355 | 15921 | 733 | Seroussi and Yakobson, 2010 |

|                   |          |     |       |     |                             |
|-------------------|----------|-----|-------|-----|-----------------------------|
| Holstein Friesian | FN562653 | 355 | 15921 | 733 | Seroussi and Yakobson, 2010 |
| Holstein Friesian | FN556941 | 355 | 15921 | 733 | Seroussi and Yakobson, 2010 |
| Holstein Friesian | FN557414 | 355 | 15921 | 733 | Seroussi and Yakobson, 2010 |
| Holstein Friesian | FN556965 | 355 | 15921 | 733 | Seroussi and Yakobson, 2010 |
| Holstein Friesian | FN556943 | 355 | 15921 | 733 | Seroussi and Yakobson, 2010 |
| Holstein Friesian | FN556938 | 355 | 15921 | 733 | Seroussi and Yakobson, 2010 |
| Holstein Friesian | FN557401 | 355 | 15921 | 733 | Seroussi and Yakobson, 2010 |
| Aberdeen Angus    | FN562587 | 355 | 15921 | 733 | Seroussi and Yakobson, 2010 |
| Holstein Friesian | FN556972 | 355 | 15921 | 733 | Seroussi and Yakobson, 2010 |
| Holstein Friesian | FN557373 | 355 | 15921 | 733 | Seroussi and Yakobson, 2010 |
| Holstein Friesian | FN557377 | 355 | 15921 | 733 | Seroussi and Yakobson, 2010 |
| Simmental         | FN562614 | 355 | 15921 | 733 | Seroussi and Yakobson, 2010 |
| Simmental         | FN562615 | 355 | 15921 | 733 | Seroussi and Yakobson, 2010 |
| Simmental         | FN562622 | 355 | 15921 | 733 | Seroussi and Yakobson, 2010 |
| Holstein Friesian | FN556949 | 355 | 15921 | 733 | Seroussi and Yakobson, 2010 |
| Hereford          | FN557435 | 355 | 15921 | 733 | Seroussi and Yakobson, 2010 |
| Holstein Friesian | FN562664 | 355 | 15921 | 733 | Seroussi and Yakobson, 2010 |
| Holstein Friesian | FN556950 | 355 | 15921 | 733 | Seroussi and Yakobson, 2010 |
| Holstein Friesian | FN557388 | 355 | 15921 | 733 | Seroussi and Yakobson, 2010 |
| Holstein Friesian | FN556982 | 355 | 15921 | 733 | Seroussi and Yakobson, 2010 |
| Holstein Friesian | FN556978 | 355 | 15921 | 733 | Seroussi and Yakobson, 2010 |
| Holstein Friesian | FN557391 | 355 | 15921 | 733 | Seroussi and Yakobson, 2010 |
| Holstein Friesian | FN557392 | 355 | 15921 | 732 | Seroussi and Yakobson, 2010 |
| Holstein Friesian | FN562635 | 355 | 15921 | 732 | Seroussi and Yakobson, 2010 |
| Holstein Friesian | FN556955 | 355 | 15921 | 732 | Seroussi and Yakobson, 2010 |
| Holstein Friesian | FN557395 | 355 | 15921 | 732 | Seroussi and Yakobson, 2010 |
| Holstein Friesian | FN556957 | 355 | 15921 | 732 | Seroussi and Yakobson, 2010 |
| Holstein Friesian | FN562648 | 355 | 15921 | 732 | Seroussi and Yakobson, 2010 |
| Holstein Friesian | FN557407 | 355 | 15921 | 732 | Seroussi and Yakobson, 2010 |

|                   |          |     |       |     |                             |
|-------------------|----------|-----|-------|-----|-----------------------------|
| Hereford          | FN557439 | 355 | 15921 | 732 | Seroussi and Yakobson, 2010 |
| Holstein Friesian | FN556939 | 355 | 15921 | 732 | Seroussi and Yakobson, 2010 |
| Holstein Friesian | FN557411 | 355 | 15921 | 732 | Seroussi and Yakobson, 2010 |
| Holstein Friesian | FN562643 | 355 | 15921 | 732 | Seroussi and Yakobson, 2010 |
| Holstein Friesian | FN562632 | 355 | 15921 | 732 | Seroussi and Yakobson, 2010 |
| Holstein Friesian | FN562654 | 355 | 15921 | 732 | Seroussi and Yakobson, 2010 |
| Holstein Friesian | FN562655 | 355 | 15921 | 732 | Seroussi and Yakobson, 2010 |
| Holstein Friesian | FN562656 | 355 | 15921 | 732 | Seroussi and Yakobson, 2010 |
| Holstein Friesian | FN556967 | 355 | 15921 | 732 | Seroussi and Yakobson, 2010 |
| Holstein Friesian | FN557374 | 355 | 15921 | 732 | Seroussi and Yakobson, 2010 |
| Holstein Friesian | FN563411 | 355 | 15921 | 732 | Seroussi and Yakobson, 2010 |
| Holstein Friesian | FN556948 | 355 | 15921 | 732 | Seroussi and Yakobson, 2010 |
| Holstein Friesian | FN557385 | 355 | 15921 | 732 | Seroussi and Yakobson, 2010 |
| Hereford          | FN557436 | 355 | 15921 | 732 | Seroussi and Yakobson, 2010 |
| Holstein Friesian | FN562631 | 355 | 15921 | 729 | Seroussi and Yakobson, 2010 |
| Bachaur           | KP223257 | 56  | 15718 | 679 | Sharma et al., 2015         |
| Bachaur           | KP223258 | 56  | 15718 | 679 | Sharma et al., 2015         |
| Bachaur           | KP223259 | 56  | 15759 | 638 | Sharma et al., 2015         |
| Bachaur           | KP223260 | 92  | 15777 | 656 | Sharma et al., 2015         |
| Gangatiri         | KP223261 | 83  | 15764 | 660 | Sharma et al., 2015         |
| Gangatiri         | KP223262 | 73  | 15718 | 696 | Sharma et al., 2015         |
| Gangatiri         | KP223263 | 73  | 15795 | 619 | Sharma et al., 2015         |
| Gangatiri         | KP223264 | 73  | 15756 | 658 | Sharma et al., 2015         |
| Kenkatha          | KP223265 | 56  | 15711 | 686 | Sharma et al., 2015         |
| Kenkatha          | KP223266 | 56  | 15715 | 682 | Sharma et al., 2015         |
| Kenkatha          | KP223267 | 58  | 15719 | 680 | Sharma et al., 2015         |
| Kenkatha          | KP223268 | 56  | 15711 | 686 | Sharma et al., 2015         |
| Kherigarh         | KP223269 | 59  | 15741 | 659 | Sharma et al., 2015         |
| Kherigarh         | KP223270 | 56  | 15718 | 679 | Sharma et al., 2015         |

|                |          |     |       |     |                                                                                |
|----------------|----------|-----|-------|-----|--------------------------------------------------------------------------------|
| Kherigarh      | KP223271 | 57  | 15718 | 680 | Sharma et al., 2015                                                            |
| Kherigarh      | KP223272 | 56  | 15718 | 679 | Sharma et al., 2015                                                            |
| Purnea         | KP223273 | 145 | 15713 | 773 | Sharma et al., 2015                                                            |
| Purnea         | KP223274 | 147 | 15719 | 769 | Sharma et al., 2015                                                            |
| Purnea         | KP223275 | 147 | 15719 | 769 | Sharma et al., 2015                                                            |
| Purnea         | KP223276 | 143 | 15632 | 852 | Sharma et al., 2015                                                            |
| Purnea         | KP223277 | 144 | 15629 | 856 | Sharma et al., 2015                                                            |
| Purnea         | KP223278 | 144 | 15632 | 853 | Sharma et al., 2015                                                            |
| Shahabadi      | KP223279 | 86  | 15718 | 709 | Sharma et al., 2015                                                            |
| Shahabadi      | KP223280 | 86  | 15718 | 709 | Sharma et al., 2015                                                            |
| Shahabadi      | KP223281 | 86  | 15718 | 709 | Sharma et al., 2015                                                            |
| Shahabadi      | KP223282 | 86  | 15718 | 709 | Sharma et al., 2015                                                            |
| Iraqi          | EU177868 | 363 | 15793 | 910 | Achilli et al., 2008                                                           |
| Iraqi          | EU177869 | 363 | 15793 | 910 | Achilli et al., 2008                                                           |
| Iranian        | EU177870 | 363 | 15793 | 910 | Achilli et al., 2008                                                           |
| Nellore        | AY126697 | 366 | 15795 | 911 | Direct submission (Depto. de Tecnologia, FCAV, Universidade Estadual Paulista) |
| Myanmar cattle | LC377275 | 366 | 15795 | 911 | Lwin et al., 2018                                                              |
| Myanmar cattle | LC377276 | 366 | 15795 | 911 | Lwin et al., 2018                                                              |
| Myanmar cattle | LC377277 | 366 | 15795 | 911 | Lwin et al., 2018                                                              |
| Myanmar cattle | LC377278 | 366 | 15795 | 911 | Lwin et al., 2018                                                              |
| Myanmar cattle | LC377279 | 366 | 15795 | 911 | Lwin et al., 2018                                                              |
| Myanmar cattle | LC377280 | 366 | 15795 | 911 | Lwin et al., 2018                                                              |
| Myanmar cattle | LC377281 | 366 | 15795 | 911 | Lwin et al., 2018                                                              |
| Myanmar cattle | LC377282 | 366 | 15795 | 911 | Lwin et al., 2018                                                              |
| Myanmar cattle | LC377283 | 366 | 15795 | 912 | Lwin et al., 2018                                                              |
| Myanmar cattle | LC377284 | 366 | 15795 | 911 | Lwin et al., 2018                                                              |
| Myanmar cattle | LC377285 | 366 | 15795 | 911 | Lwin et al., 2018                                                              |
| Myanmar cattle | LC377286 | 366 | 15795 | 911 | Lwin et al., 2018                                                              |

|                  |          |     |       |     |                   |
|------------------|----------|-----|-------|-----|-------------------|
| Myanmar cattle   | LC377287 | 366 | 15795 | 911 | Lwin et al., 2018 |
| Myanmar cattle   | LC377288 | 366 | 15795 | 911 | Lwin et al., 2018 |
| Myanmar cattle   | LC377289 | 366 | 15795 | 910 | Lwin et al., 2018 |
| Myanmar cattle   | LC377290 | 366 | 15795 | 910 | Lwin et al., 2018 |
| Myanmar cattle   | LC377291 | 366 | 15795 | 910 | Lwin et al., 2018 |
| Myanmar cattle   | LC377292 | 366 | 15795 | 910 | Lwin et al., 2018 |
| Myanmar cattle   | LC377293 | 366 | 15795 | 910 | Lwin et al., 2018 |
| Myanmar cattle   | LC377294 | 366 | 15795 | 910 | Lwin et al., 2018 |
| Myanmar cattle   | LC377295 | 366 | 15795 | 910 | Lwin et al., 2018 |
| Myanmar cattle   | LC377296 | 366 | 15795 | 910 | Lwin et al., 2018 |
| Myanmar cattle   | LC377297 | 366 | 15795 | 911 | Lwin et al., 2018 |
| Myanmar cattle   | LC377298 | 366 | 15795 | 911 | Lwin et al., 2018 |
| Myanmar cattle   | LC377299 | 366 | 15795 | 911 | Lwin et al., 2018 |
| Myanmar cattle   | LC377300 | 366 | 15795 | 910 | Lwin et al., 2018 |
| Myanmar cattle   | LC377301 | 366 | 15795 | 911 | Lwin et al., 2018 |
| Bhutanese cattle | AB268559 | 366 | 15795 | 910 | Lin et al., 2007  |
| Bhutanese cattle | AB268560 | 366 | 15795 | 910 | Lin et al., 2007  |
| Bhutanese cattle | AB268561 | 366 | 15795 | 909 | Lin et al., 2007  |
| Bhutanese cattle | AB268562 | 366 | 15795 | 909 | Lin et al., 2007  |
| Bhutanese cattle | AB268563 | 366 | 15795 | 910 | Lin et al., 2007  |
| Bhutanese cattle | AB268564 | 366 | 15795 | 910 | Lin et al., 2007  |
| Bhutanese cattle | AB268565 | 366 | 15795 | 910 | Lin et al., 2007  |
| Bhutanese cattle | AB268566 | 366 | 15795 | 910 | Lin et al., 2007  |
| Bhutanese cattle | AB268567 | 366 | 15795 | 910 | Lin et al., 2007  |
| Bhutanese cattle | AB268568 | 366 | 15795 | 910 | Lin et al., 2007  |
| Bhutanese cattle | AB268569 | 366 | 15795 | 910 | Lin et al., 2007  |
| Bhutanese cattle | AB268570 | 366 | 15795 | 909 | Lin et al., 2007  |
| Bhutanese cattle | AB268571 | 366 | 15795 | 910 | Lin et al., 2007  |
| Bhutanese cattle | AB268572 | 366 | 15795 | 910 | Lin et al., 2007  |

|                     |           |       |       |       |                      |
|---------------------|-----------|-------|-------|-------|----------------------|
| Bhutanese cattle    | AB268573  | 366   | 15795 | 910   | Lin et al., 2007     |
| Bhutanese cattle    | AB268574  | 366   | 15795 | 910   | Lin et al., 2007     |
| Bhutanese cattle    | AB268575  | 366   | 15795 | 910   | Lin et al., 2007     |
| Bhutanese cattle    | AB268576  | 366   | 15795 | 910   | Lin et al., 2007     |
| Bhutanese cattle    | AB268577  | 366   | 15795 | 910   | Lin et al., 2007     |
| Bhutanese cattle    | AB268578  | 366   | 15795 | 910   | Lin et al., 2007     |
| Bhutanese cattle    | AB268579  | 366   | 15795 | 910   | Lin et al., 2007     |
| Bhutanese cattle    | AB268580  | 366   | 15795 | 910   | Lin et al., 2007     |
| Bhutanese cattle    | AB268581  | 366   | 15795 | 910   | Lin et al., 2007     |
| <i>Bison bison</i>  | NC_012346 | 16319 | 1     | 16319 | Achilli et al., 2008 |
| <i>Capra hircus</i> | AF533441  | 16640 | 1     | 16640 | Pietro et al., 2003  |
| <i>Ovis aries</i>   | NC_001941 | 16616 | 1     | 16616 | Hiendleder, 1998     |
