# Supplementary material for: Mitochondrial DNA diversity of D-loop region in three native Turkish cattle breeds
Source: Arch Anim Breed. 2023 Jan 24;66(1):31–40. doi: 10.5194/aab-66-31-2023 (PMC9901521; doi:10.5194/aab-66-31-2023)
Supplement: The supplement related to this article is available online at: https://doi.org/10.5194/aab-66-31-2023-supplement. [file aab-66-31-supplement.zip › File S3.pdf]

**Supplementary file 3.** Unique and shared-sequences between native Turkish and cosmopolitan-aurine and indicine cattle

| Samples | Unique | Aberdeen Angus | Brown Swiss | Hereford | Holstein Friesian | Jersey   | Simmental | Iranian | Myanmar | Bhutanese |
|---------|--------|----------------|-------------|----------|-------------------|----------|-----------|---------|---------|-----------|
| AB1     | Yes    | -              | -           | -        | -                 | -        | -         | -       | -       | -         |
| AB2     | Yes    | -              | -           | -        | -                 | -        | -         | -       | -       | -         |
| AB3     | Yes    | -              | -           | -        | -                 | -        | -         | -       | -       | -         |
| AB4     | Yes    | -              | -           | -        | -                 | -        | -         | -       | -       | -         |
| AB5     | No     | -              | -           | -        | FN562644          | -        | FN562612  | -       | -       | -         |
| AB6     | No     | -              | -           | -        | FN562644          | -        | FN562612  | -       | -       | -         |
| AB7     | No     | FJ815946       | AF016072    | -        | AF016082          | AF016088 | AF492427  | -       | -       | -         |
| AB8     | No     | FJ815946       | AF016072    | -        | AF016082          | AF016088 | AF492427  | -       | -       | -         |
| AB9     | Yes    | -              | -           | -        | -                 | -        | -         | -       | -       | -         |
| AB10    | Yes    | -              | -           | -        | -                 | -        | -         | -       | -       | -         |
| AB11    | No     | FJ815946       | AF016072    | -        | AF016082          | AF016088 | AF492427  | -       | -       | -         |
| AB12    | Yes    | -              | -           | -        | -                 | -        | -         | -       | -       | -         |
| AB13    | Yes    | -              | -           | -        | -                 | -        | -         | -       | -       | -         |
| AB14    | Yes    | -              | -           | -        | -                 | -        | -         | -       | -       | -         |
| AB15    | Yes    | -              | -           | -        | -                 | -        | -         | -       | -       | -         |
| AB16    | No     | -              | -           | -        | FN562644          | -        | FN562612  | -       | -       | -         |
| AB17    | No     | FJ815946       | AF016072    | -        | AF016082          | AF016088 | AF492427  | -       | -       | -         |
| AB18    | Yes    |                |             |          |                   |          |           |         |         |           |
| AB19    | No     | -              | -           | -        | AF361447          | -        | -         | -       | -       | -         |
| AB20    | Yes    | -              | -           | -        | -                 | -        | -         | -       | -       | -         |
| AB21    | Yes    | -              | -           | -        | -                 | -        | -         | -       | -       | -         |
| AB22    | No     | FJ815946       | AF016072    | -        | AF016082          | AF016088 | AF492427  | -       | -       | -         |
| AB23    | Yes    | -              | -           | -        | -                 | -        | -         | -       | -       | -         |
| AB24    | Yes    | -              | -           | -        | -                 | -        | -         | -       | -       | -         |
| EAR1    | No     | -              | -           | FN557438 | FN556942          | -        | -         | -       | -       | -         |
| EAR2    | No     | -              | -           | -        | FN562630          | -        | -         | -       | -       | -         |
| EAR3    | No     | FJ815946       | AF016072    | -        | AF016082          | AF016088 | AF492427  | -       | -       | -         |
| EAR4    | No     | FJ815946       | AF016072    | -        | AF016082          | AF016088 | AF492427  | -       | -       | -         |

|       |     |          |          |          |          |          |          |          |          |          |
|-------|-----|----------|----------|----------|----------|----------|----------|----------|----------|----------|
| EAR5  | No  | FJ815946 | AF016072 | -        | AF016082 | AF016088 | AF492427 | -        | -        | -        |
| EAR6  | No  | FJ815946 | AF016072 | -        | AF016082 | AF016088 | AF492427 | -        | -        | -        |
| EAR7  | Yes | -        | -        | -        | -        | -        | -        | -        | -        | -        |
| EAR8  | No  | -        | -        | -        | FN562630 | -        | -        | -        | -        | -        |
| EAR9  | No  | -        | -        | FN557438 | FN556942 | -        | -        | -        | -        | -        |
| EAR10 | Yes | -        | -        | -        | -        | -        | -        | -        | -        | -        |
| EAR11 | No  | FJ815946 | AF016072 | -        | AF016082 | AF016088 | AF492427 | -        | -        | -        |
| EAR12 | Yes | -        | -        | -        | -        | -        | -        | -        | -        | -        |
| EAR13 | No  | FJ815946 | AF016072 | -        | AF016082 | AF016088 | AF492427 | -        | -        | -        |
| EAR14 | No  | -        | AF016078 | -        | FN563411 | -        | -        | -        | -        | -        |
| EAR15 | Yes | -        | -        | -        | -        | -        | -        | -        | -        | -        |
| EAR16 | Yes | -        | -        | -        | -        | -        | -        | -        | -        | -        |
| EAR17 | No  | -        | -        | -        | FN562644 | -        | FN562612 | -        | -        | -        |
| EAR18 | Yes | -        | -        | -        | -        | -        | -        | -        | -        | -        |
| EAR19 | No  | -        | -        | -        | FN562644 | -        | FN562612 | -        | -        | -        |
| EAR20 | No  | -        | -        | -        | FN562644 | -        | FN562612 | -        | -        | -        |
| EAR21 | No  | -        | -        | -        | FN562644 | -        | FN562612 | -        | -        | -        |
| EAR22 | No  | -        | -        | -        | FN562644 | -        | FN562612 | -        | -        | -        |
| EAR23 | No  | -        | -        | -        | FN562644 | -        | FN562612 | -        | -        | -        |
| ZAV1  | No  | -        | -        | -        | -        | -        | -        | EU177870 | LC377299 | AB268559 |
| ZAV2  | No  | FJ815946 | AF016072 | -        | AF016082 | AF016088 | AF492427 | -        | -        | -        |
| ZAV3  | Yes | -        | -        | -        | -        | -        | -        | -        | -        | -        |
| ZAV4  | No  | -        | -        | -        | -        | -        | -        | EU177870 | LC377299 | AB268559 |
| ZAV5  | Yes | -        | -        | -        | -        | -        | -        | -        | -        | -        |
| ZAV6  | No  | -        | -        | FN557438 | FN556942 | -        | -        | -        | -        | -        |
| ZAV7  | No  | FJ815946 | AF016072 | -        | AF016082 | AF016088 | AF492427 | -        | -        | -        |
| ZAV8  | No  | -        | -        | -        | -        | -        | -        | EU177870 | LC377299 | AB268559 |
| ZAV9  | No  | -        | -        | FN557438 | FN556942 | -        | -        | -        | -        | -        |
| ZAV10 | No  | FJ815946 | AF016072 | -        | AF016082 | AF016088 | AF492427 | -        | -        | -        |
| ZAV11 | No  | FJ815946 | AF016072 | -        | AF016082 | AF016088 | AF492427 | -        | -        | -        |
| ZAV12 | No  | -        | -        | -        | -        | -        | -        | EU177870 | LC377299 | AB268559 |

|       |    |          |          |          |          |          |          |   |   |   |
|-------|----|----------|----------|----------|----------|----------|----------|---|---|---|
| ZAV13 | No | FJ815946 | AF016072 | -        | AF016082 | AF016088 | AF492427 | - | - | - |
| ZAV14 | No | FJ815946 | AF016072 | -        | AF016082 | AF016088 | AF492427 | - | - | - |
| ZAV15 | No | -        | -        | FN557438 | FN556942 | -        | -        | - | - | - |
